# Supplementary material for: Minor Ginsenoside Rg2 and Rh1 Attenuates LPS-Induced Acute Liver and Kidney Damages via Downregulating Activation of TLR4-STAT1 and Inflammatory Cytokine Production in Macrophages
Source: PubMed Central journal article supplement (PMC7555743; doi:10.3390/ijms21186656), 2020-09-11
Supplement: ijms-21-06656-s001.pdf [file ijms-21-06656-s001.pdf]

## Supplementary material

### Enzyme-linked immunosorbent assay (ELISA)

Levels of TNF- $\alpha$  and IL-1 $\beta$  in plasma was measured using an ELISA kits (R&D, Minneapolis, MN) according to the manufacturer's instructions. Briefly, 50  $\mu$ l of biotinylated antibody reagent and the samples were added to the anti-mouse TNF- $\alpha$  and IL-1 $\beta$  precoated 96-well strip plates. The plates were covered and kept at room temperature for 2 h and washed three times followed by the addition of 100  $\mu$ l of Streptavidin–HRP concentrate. After adding 100  $\mu$ l of TMB substrate solution, the reaction was quenched by adding 100  $\mu$ l of TMB stop solution, and the absorbance of the plates was measured at 450 nm to 550 nm using a microplate reader. A standard curve was run on each assay plate using recombinant TNF- $\alpha$  and IL-1 $\beta$  in serial dilutions.

### Supplementary figure legend

**Figure S1.** Effect of ginsenosides Rg2 and Rh1 on activation of MAPK signaling in LPS-stimulated macrophages. Cells were pre-treated with ginsenosides Rg2, Rh1, and the combination of Rg2 and Rh1 (10, and 25  $\mu$ g/mL) or dexamethasone (Dex) for 1 h followed by treatment with LPS (500 ng/mL) for 1 h. In the combination of Rg2 and Rh1, Rg2 and Rh1 were mixed with a ratio of 1:1 (10  $\mu$ g/mL of the combination contains 5  $\mu$ g/mL Rg2 and 5  $\mu$ g/mL Rh1, and so forth). The ratio of phosphorylated STAT1/total STAT1 expression represents as the mean  $\pm$  SEM ( $n = 3$ ). \*\*\* $p < 0.001$  compared with control sample, # $p < 0.05$ , ## $p < 0.01$ , and ### $p < 0.001$  compared with LPS-treated sample.

**Figure S2.** Inhibitory effect of Rg2 and Rh1 on cytokine productions in plasma of LPS-

stimulated mice. Data are represented as mean  $\pm$  SEM ( $n = 6$ ).  $^{**}p < 0.01$  compared with control sample,  $^{##}p < 0.01$  compared with LPS-treated sample.

### Supplementary figures

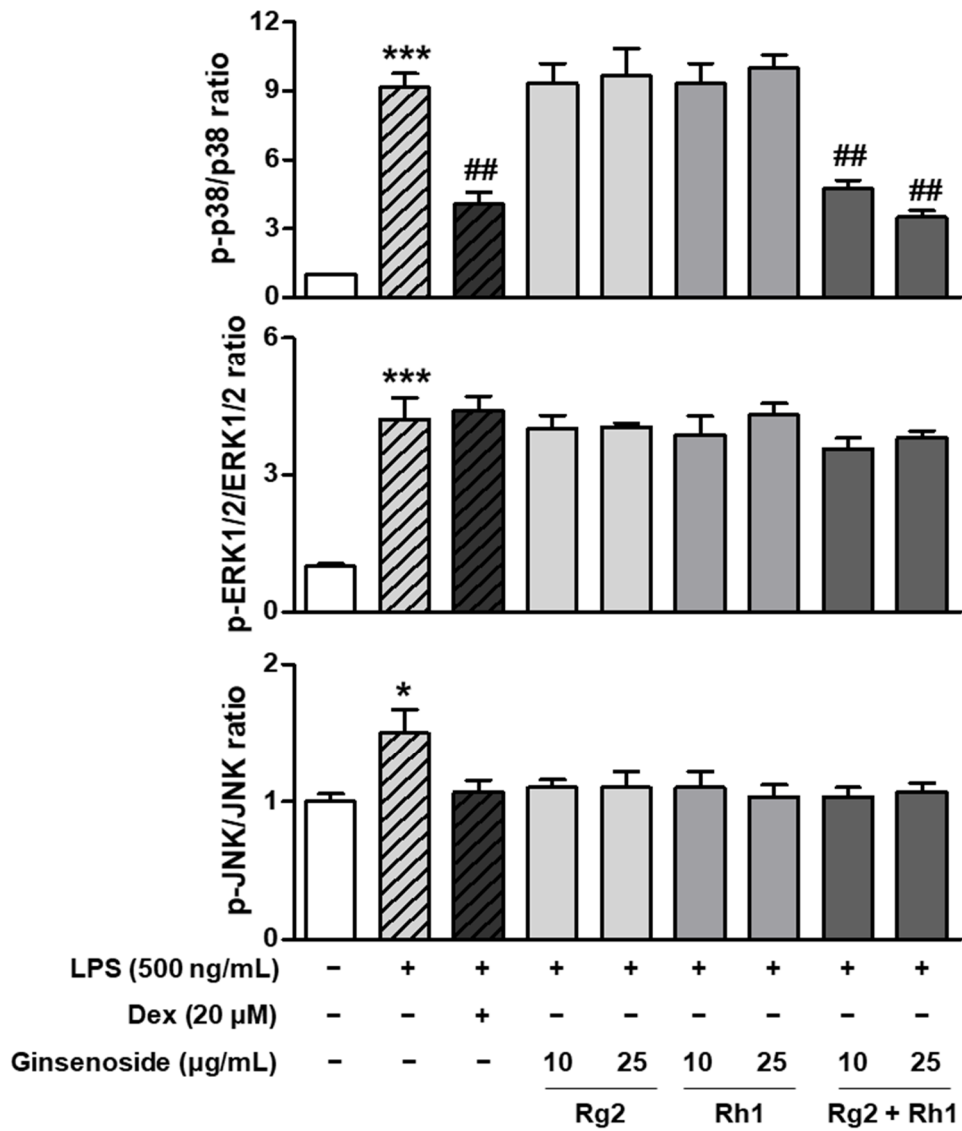

Figure S1

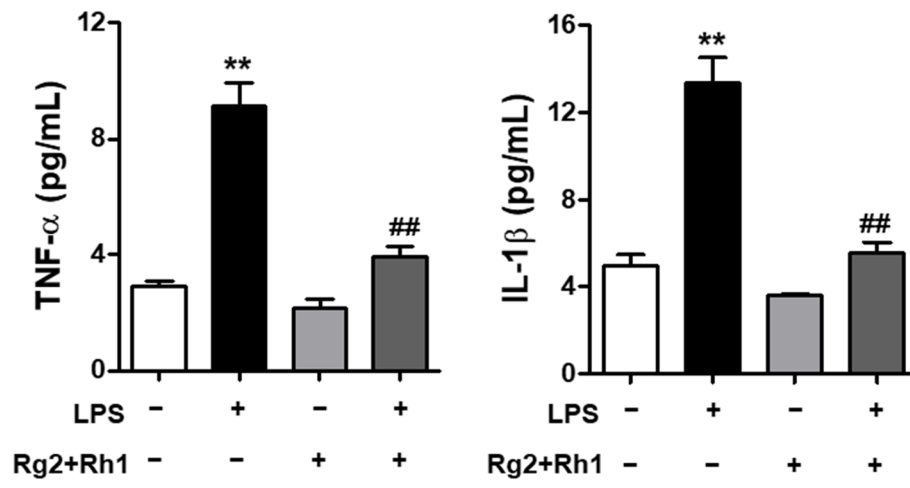

Figure S2
